# Supplementary material for: Functional interrogation of lymphocyte subsets in alopecia areata using single-cell RNA sequencing
Source: PubMed Central journal article supplement — Proc Natl Acad Sci U S A. 2023 Jul 10;120(29):e2305764120. doi: 10.1073/pnas.2305764120 (PMC10629527; doi:10.1073/pnas.2305764120), 2023-07-10
Supplement: pnas.2305764120.sapp.pdf [file pnas.2305764120.sapp.pdf]

## Supplementary Information for

## Functional interrogation of lymphocyte subsets in alopecia areata using single-cell RNA sequencing

Eunice Y. Lee,<sup>1,2,6</sup> Zhenpeng Dai,<sup>1,6</sup> Abhinav Jaiswal<sup>3</sup>, Eddy Hsi Chun Wang,<sup>1</sup> Niroshana Anandasabapathy<sup>3,4</sup>, Angela M. Christiano<sup>1,5,\*</sup>

### Affiliations:

<sup>1</sup>Department of Dermatology, Columbia University Irving Medical Center. New York, NY, USA.

<sup>2</sup>Medical Scientist Training Program, Columbia University. New York, NY, USA.

<sup>3</sup>Department of Dermatology, Weill Cornell Medicine. New York, NY, USA.

<sup>4</sup>Department of Microbiology and Immunology, Weill Cornell Medicine. New York, NY, USA.

<sup>5</sup>Department of Genetics & Development, Columbia University Irving Medical Center; New York, NY 10032.

<sup>6</sup>These authors contributed equally to this work.

\*Corresponding author: Angela M. Christiano. **Email:** amc65@cumc.columbia.edu

### This PDF file includes:

Supplementary Materials and Methods

Figures S1 to S8

Tables S1 to S2

SI References

## **Supplementary Materials and Methods**

*Preparation of single-cell suspensions from mouse skin* After mice were euthanized in accordance with Columbia University IACUC guidelines, hair was shaved using a clipper. The dorsal skin was isolated, subcutaneous fat was removed, and was cut into small pieces prior to digestion with 0.25% collagenase type IV (Sigma-Aldrich, #C5138) in Dulbecco's Modified Eagle Medium (DMEM; Thermo Fisher Scientific, #21068028) at 37°C for 1 hour in a shaking incubator. Collagenase was neutralized with Advanced RPMI 1640 Medium (Fisher Scientific, #12-633-012) + 10% FBS (Gibco, #16000044) and the digested skin was passed through a 70µm strainer. The flow through was rinsed twice with centrifugation at 350g, 4°C.

*Fluorescence-activated cell sorting (FACS) for scRNAseq* For mouse skin single-cell suspensions, cells were resuspended and washed in 2% FBS in Cell Staining Buffer (BioLegend, #420201), then incubated with FITC-anti-mouse CD45 antibody (BioLegend, #103108) at a 1:100 dilution for 30 minutes on ice. Cells were washed in 2% FBS/Cell Staining Buffer and strained through a 50-µm filter. Prior to FACS, cells were stained with propidium iodide (Fisher Scientific, #00-6990-50; 1:500). Live CD45+ cells (FITC+, propidium iodide-) were isolated for subsequent scRNAseq. For human skin single-cell suspensions, cells were resuspended and washed in 2% FBS in Cell Staining Buffer, then stained with DRAQ5 (BioLegend, #424201; 1:1000) and SYTOX-Green (Thermo Fisher Scientific, #S7020; 1:500) prior to FACS isolation for DRAQ5- SYTOX-Green- live cells.

*Flow cytometry* Single-cell suspensions were resuspended and washed in 2% FBS in Cell Staining Buffer, then stained with LIVE/DEAD Fixable Blue Dead Cell Stain Kit (Thermo Fisher Scientific, #L34962) according to the manufacturer's protocol. For surface marker staining, cells were incubated with antibodies at 1:200 in the dark on ice for 30 minutes. For intracellular staining, cells were fixed, permeabilized, and stained using the FOXP3/Transcription Factor Staining Buffer Set Kit (Thermo Fisher Scientific, #00-5523-00) and its accompanying protocol. Antibodies for intracellular staining were diluted at 1:200. A list of antibodies can be found in Table S3.

*T<sub>reg</sub> suppression assay* CD25<sup>hi</sup> CD4<sup>+</sup> T<sub>reg</sub> and non-T<sub>reg</sub> T cells were isolated from the skin-draining lymph nodes of grafted C3H/HeJ mice with AA and UG controls on an Influx cell sorter. Non-T<sub>reg</sub> T cells were labeled with 2.5 μM CellTrace Violet, cultured with the T<sub>regs</sub> at various ratios, and stimulated with plated-bound anti-CD3 (1 μg/ml) (Bio X Cell; 145-2C11) and anti-CD28 (2 μg/ml) (Bio X Cell; 37.51) in a flat-bottom 96-well plate (Thermo Fisher Scientific) for 4 days. Percent suppression of effector T cell proliferation was calculated according to previous reports (1).

*Processing and analysis of scRNAseq data* FASTQ files were aligned using the CellRanger pipeline (v3.0.1 and mm10 reference genome for mouse scRNAseq experiments, v3.0.2 and GRCh38 reference genome for human scRNAseq experiments). CellRanger outputs (barcodes.tsv, genes.tsv, and matrix.mts) for each sample were loaded into R (version 4.1.1), where cells were subject to further quality control methods using the Seurat package (version 4.0.4) (2, 3). For the mouse dataset, we filtered cells to exclude low quality cells and doublets with > 15% mitochondrial RNA content, < 200 unique molecular identifier (UMI) counts, and/or > 5000 UMI counts. For the human dataset, we excluded cells with > 10% mitochondrial RNA content, < 200 UMI counts, and/or > 4000 UMI counts. The distribution of mitochondrial RNA content, UMI counts, and unique gene counts across samples after quality control filtering is shown in SI Appendix, Fig. S1B.

The Seurat package was then used to merge samples into a single dataset and perform downstream analyses. Gene expression matrices were processed via the 'SCTransform' function for normalization, identification of highly variable genes, and to regress out unwanted sources of variation (i.e. UMI counts and mitochondrial RNA content) (4). Batch effects were corrected using the canonical correlation analysis (CCA) workflow (2, 3). Then, using the top 3000 highly variable genes identified via SCTransform, we performed a principal component analysis (PCA). The first 30 principal components were used to perform uniform manifold approximation and projection (UMAP) dimensionality reduction into a 2-dimensional visualization space.

Following UMAP reduction, unsupervised clustering was performed as described in Obradovic et al. (2021) (5). Briefly, we used the 'FindClusters' function to cluster the dataset with resolution values from 0.01 to 1.0 at intervals of 0.01. At each resolution, we computed a silhouette score based on a subsampling of 1000 clustered cells, and used this value to select an optimum resolution within this range. This method

was utilized to control for over-clustering, since the FindClusters function allows for arbitrary selection of resolution values for clustering. We annotated clusters based on the expression of canonical markers (i.e. *Cd8a* or *Cd8b1* expression for CD8 T cells), the top enriched genes relative to other clusters (identified using the Seurat 'FindAllMarkers' function), and the SingleR R package (version 1.6.1) (6). For the SingleR analysis, we specifically used the mouse bulk RNA sequencing dataset from the Immunological Genome Project for the mouse dataset and the Human Primary Cell Atlas for the human dataset (7, 8). Differential gene expression (DGE) analyses were performed using the Seurat 'FindMarkers' command and the Model-based Analysis of Single Cell Transcriptomics (MAST) method (9). When applicable, gene set enrichment analysis (GSEA) using DGE outputs was performed using the clusterProfiler R package (version 4.0.5).

To assess changes in the distribution of T lymphocytes and T lymphocyte subsets between AA and UG/CTRL, we first identified each population based on canonical markers established in the literature. For instance, murine T cells were defined as cells expressing *Cd3e/Cd3d/Cd3g*. CD8<sup>+</sup> T cells were defined based on co-expression of *Cd3e/Cd3d/Cd3g* and *Cd8a/Cd8b1*, with no expression of *Cd4*. CD4<sup>+</sup> T<sub>h</sub> cells co-expressed *Cd3e/Cd3d/Cd3g* and *Cd4*, with no expression of *Cd8a/Cd8b1* and *Foxp3*. CD4<sup>+</sup> T<sub>reg</sub> co-expressed *Cd3e/Cd3d/Cd3g*, *Cd4*, and *Foxp3* with no expression of *Cd8a/Cd8b1* and *Foxp3*. NK T cells were defined as cells in Cluster 6, which represented NK/NKT cells, that expressed *Cd3e/Cd3d/Cd3g*.  $\gamma\delta$  T cells were defined as cells that co-expressed *Cd3e/Cd3d/Cd3g* with genes encoding components of the  $\gamma\delta$  TCR chain, such as *Trdc* and *Trdv1*. Human T cells and T cell subsets were identified using the human homologs of the mouse genes.

To perform pseudotime trajectory analysis, we employed the monocle R package (version 2.20.0) (10, 11). Cells were ordered using the top highly variable genes identified via the 'SCTransform' function in Seurat, as described above. Kinetic scoring analyses for CD8<sup>+</sup> T cell subsets were performed as described in Jaiswal et al. (2022) (12). Briefly, expression matrices from datasets of LCMV infection (GEO: GSE10239, GEO: GSE41867), vaccinia virus infection (GEO: GSE79805), and human yellow fever vaccination (GEO: GSE26347, GEO: GSE100745) were transformed into a log<sub>2</sub> (normalized intensity + 1) format for microarrays and a log<sub>2</sub>(FPKM + 1) for RNA sequencing datasets (13–16). Transformed matrices were then filtered on genes with at least one read mapped across all samples. For each timepoint, the signature enrichment was compared to the immediately preceding timepoint. For the LCMV infection and the GEO:

GSE26347 yellow fever dataset, significance was calculated via mixed-effects modeling using the lme function from the nlme package in R, with a random intercept considered for each sample scored. For the vaccinia virus infection, the slope of gene enrichment (shaded) was calculated using lm. \*p < 0.05; \*\*p < 0.01; \*\*\*p < 0.001; \*\*\*\*p < 0.0001. For the GEO: GSE100745 yellow fever dataset, significance values for enrichment at a given time point versus the time point preceding it were calculated using a Student's t-test.

# Supplementary Figures

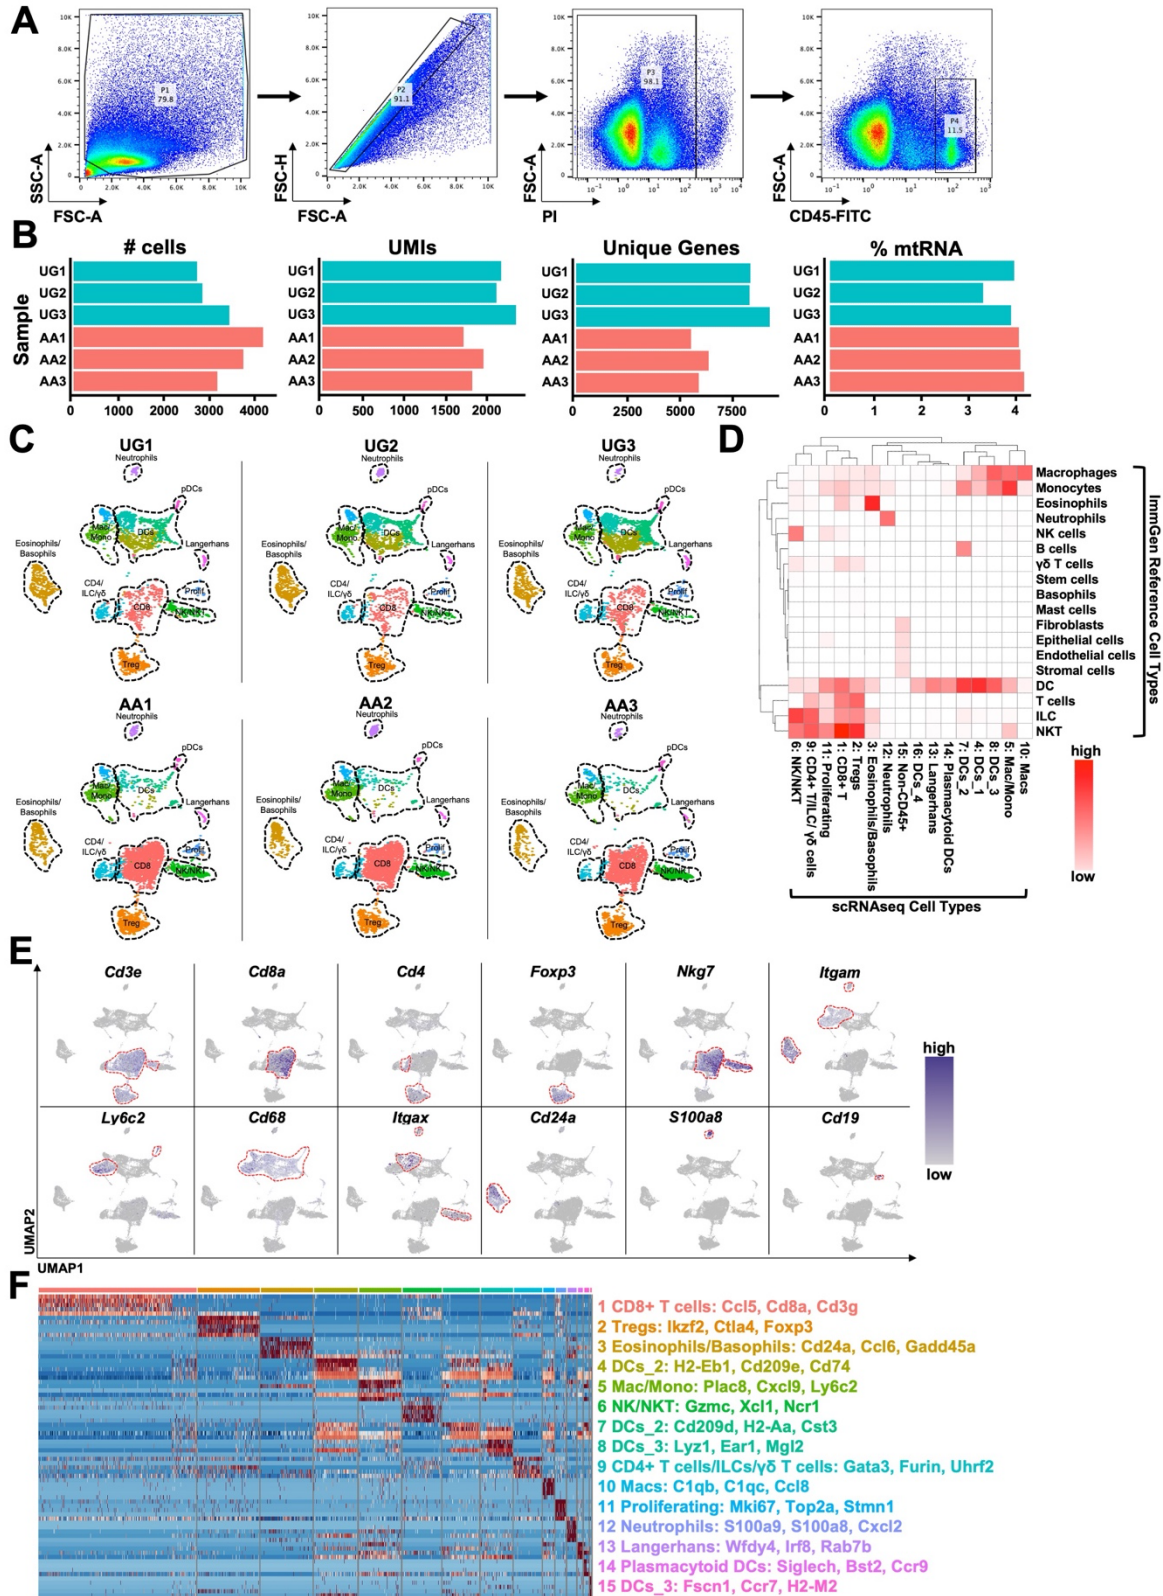

**Fig. S1. Quality control and annotation of scRNAseq data from CD45+ skin immune cells in murine**

**AA.** A) Representative plots showing FACS isolation of live CD45+ cells for scRNAseq. B) Number of cells, UMIs, genes, and mitochondrial RNA content in scRNAseq data across the six sequenced samples. C) Heatmap of normalized correction values for predicted cell types based on the SingleR R package, using the mouse Immunological Genome Project microarray dataset as a reference (6, 7). D) UMAPs for each individual sample in the combined scRNAseq E) Expression of canonical marker genes for each cell type (i.e. *Cd3e* is a marker of T cells; *Cd8a* is a marker of CD8+ T cells). F) Heatmap of top highly expressed genes in each cluster. dataset. Data from each sample was aligned using the canonical correlational analysis function in the Seurat R package.

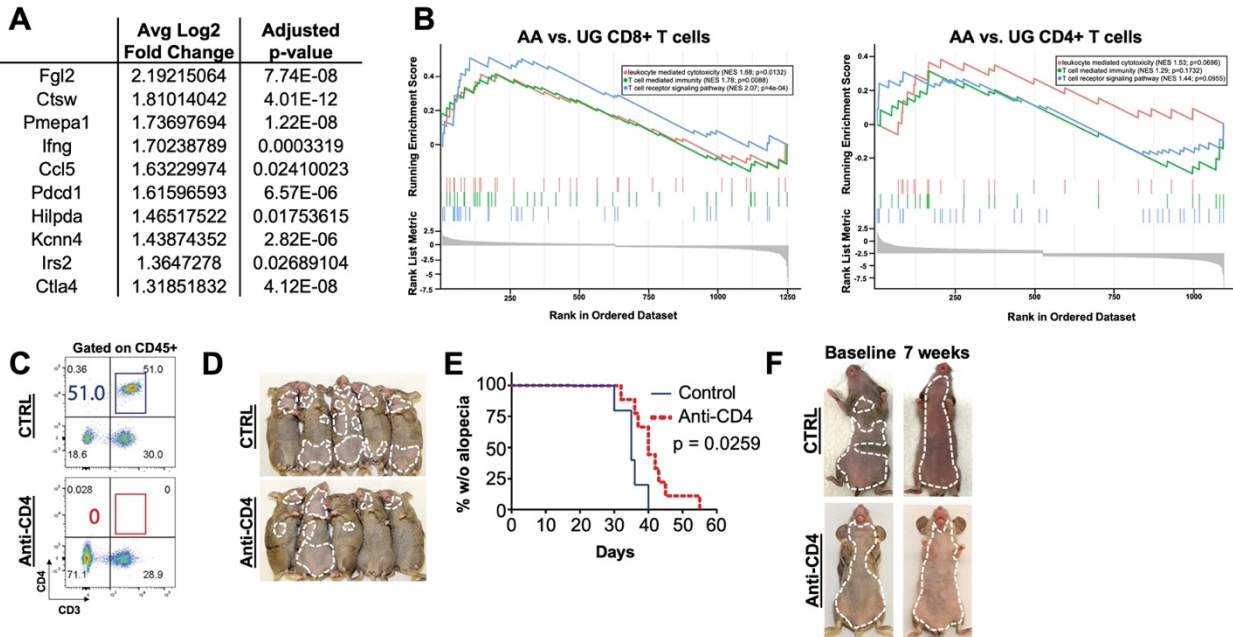

**Fig. S2. Depletion of CD4<sup>+</sup> T cells delays AA, but does not prevent or reverse disease.** A) Top 10 genes upregulated in AA-associated CD4<sup>+</sup> T cells compared to UG-associated CD4<sup>+</sup> T cells in differential gene expression analysis. Both genes associated with T cell activation (*Ctsw*, *Ifng*, *Ccl5*) and those associated with T<sub>reg</sub> function (*Fgl2*, *Pdcd1*, *Ctla4*) were upregulated in AA CD4<sup>+</sup> T cells. B) GSEA for gene signatures associated with leukocyte mediated cytotoxicity, T cell mediated immunity, and T cell receptor signaling using differentially expressed genes between CD8<sup>+</sup> and CD4<sup>+</sup> T cells across disease conditions. Note higher AA-associated CD8<sup>+</sup> T cells show higher Normalized Enrichment Scores (NES) with  $p < 0.05$ , whereas CD4<sup>+</sup> T cells show lower NES with  $p > 0.05$ . C) Treatment of grafted C3H/HeJ mice with anti-CD4 efficiently depleted CD4<sup>+</sup> T cells compared to isotype control. D) Anti-CD4 administration in grafted C3H/HeJ mice prior to hair loss onset delayed disease development relative to isotype control. E) Kaplan-Meier curve for experiment shown in D). F) Anti-CD4 administration in grafted C3H/HeJ mice with established disease had no effect on disease progression. Both anti-CD4 and isotype control groups progressed to total body hair loss by 7 weeks from the onset of treatment.



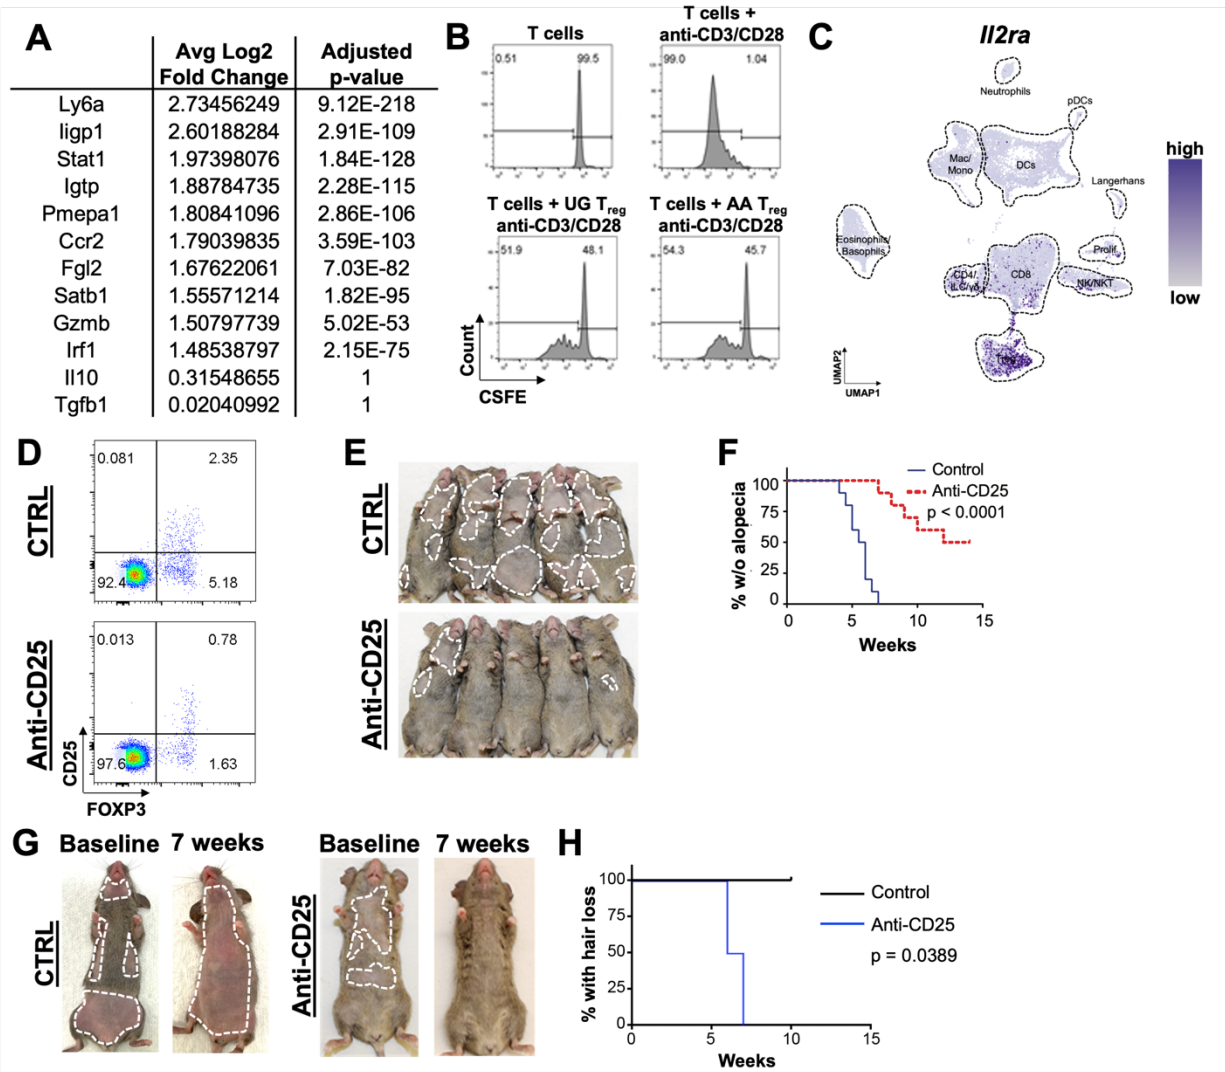

**Fig. S3. CD25+ T cells are required for AA onset and progression.** A) Differential gene expression analysis between AA and UG T<sub>reg</sub>, showing the top 10 genes upregulated in AA T<sub>reg</sub> as well as *Il10* and *Tgfb1*, which encode anti-inflammatory cytokines important for T<sub>reg</sub>-mediated immunosuppression. Note there is no statistically significant difference in the expression of *Il10* and *Tgfb1*. B) CellTrace Violet (CSFE)-labeled T cells isolated from the skin-draining lymph nodes (SDLN) of UG mice were cultured alone, alone with anti-CD3/CD28 stimulation, or in the presence of UG T<sub>reg</sub> or AA T<sub>reg</sub> alongside anti-CD3/CD28 stimulation. T<sub>reg</sub> suppressive capacity was assessed by flow cytometry of CFSE levels in labeled T cells. C) Expression of *Il2ra* (CD25) in scRNAseq data of CD4<sup>+</sup> skin immune cells in murine AA. D) Anti-CD25 administration depleted CD25<sup>+</sup> cells in treated mice relative to mice treated with isotype control. E) Anti-CD25 administration in grafted C3H/HeJ mice prior to AA onset prevented disease. F) Kaplan-Meier curve

for experiment shown in E). G) Anti-CD25 administration in grafted C3H/HeJ mice with established AA reversed disease compared to those treated with isotype control. H) Kaplan-Meier curve for experiment shown in G).

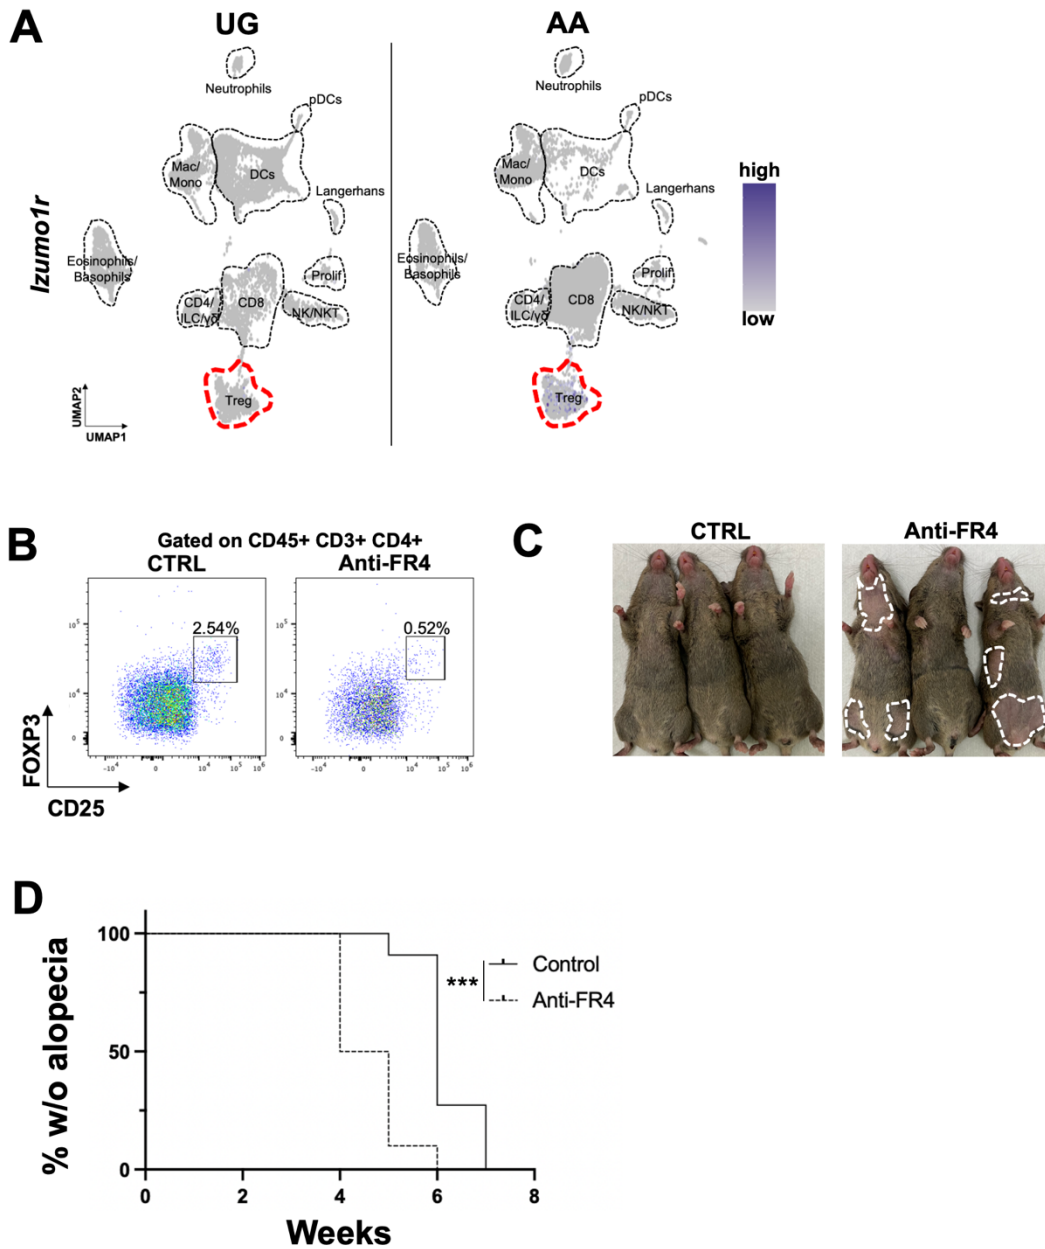

**Fig. S4. FR4+ T<sub>reg</sub> are protective in AA.** A) Expression of *Izumo1r* overlaid onto the overall CD45+ UMAP for each disease condition, showing specific localization of *Izumo1r* expression in the CD4+ T<sub>reg</sub> cluster. B) Anti-FR4 administration depleted FoxP3+ CD25+ T<sub>reg</sub> relative to mice treated with isotype control. Gated on CD45+ CD3+ CD4+. C) Anti-FR4 administration in grafted C3H/HeJ mice prior to the occurrence of hair loss accelerated disease onset relative to isotype control. D) Kaplan-Meier curve for experiment shown in C). \**p* < 0.05; \*\**p* < 0.01; \*\*\**p* < 0.001; \*\*\*\**p* < 0.0001.

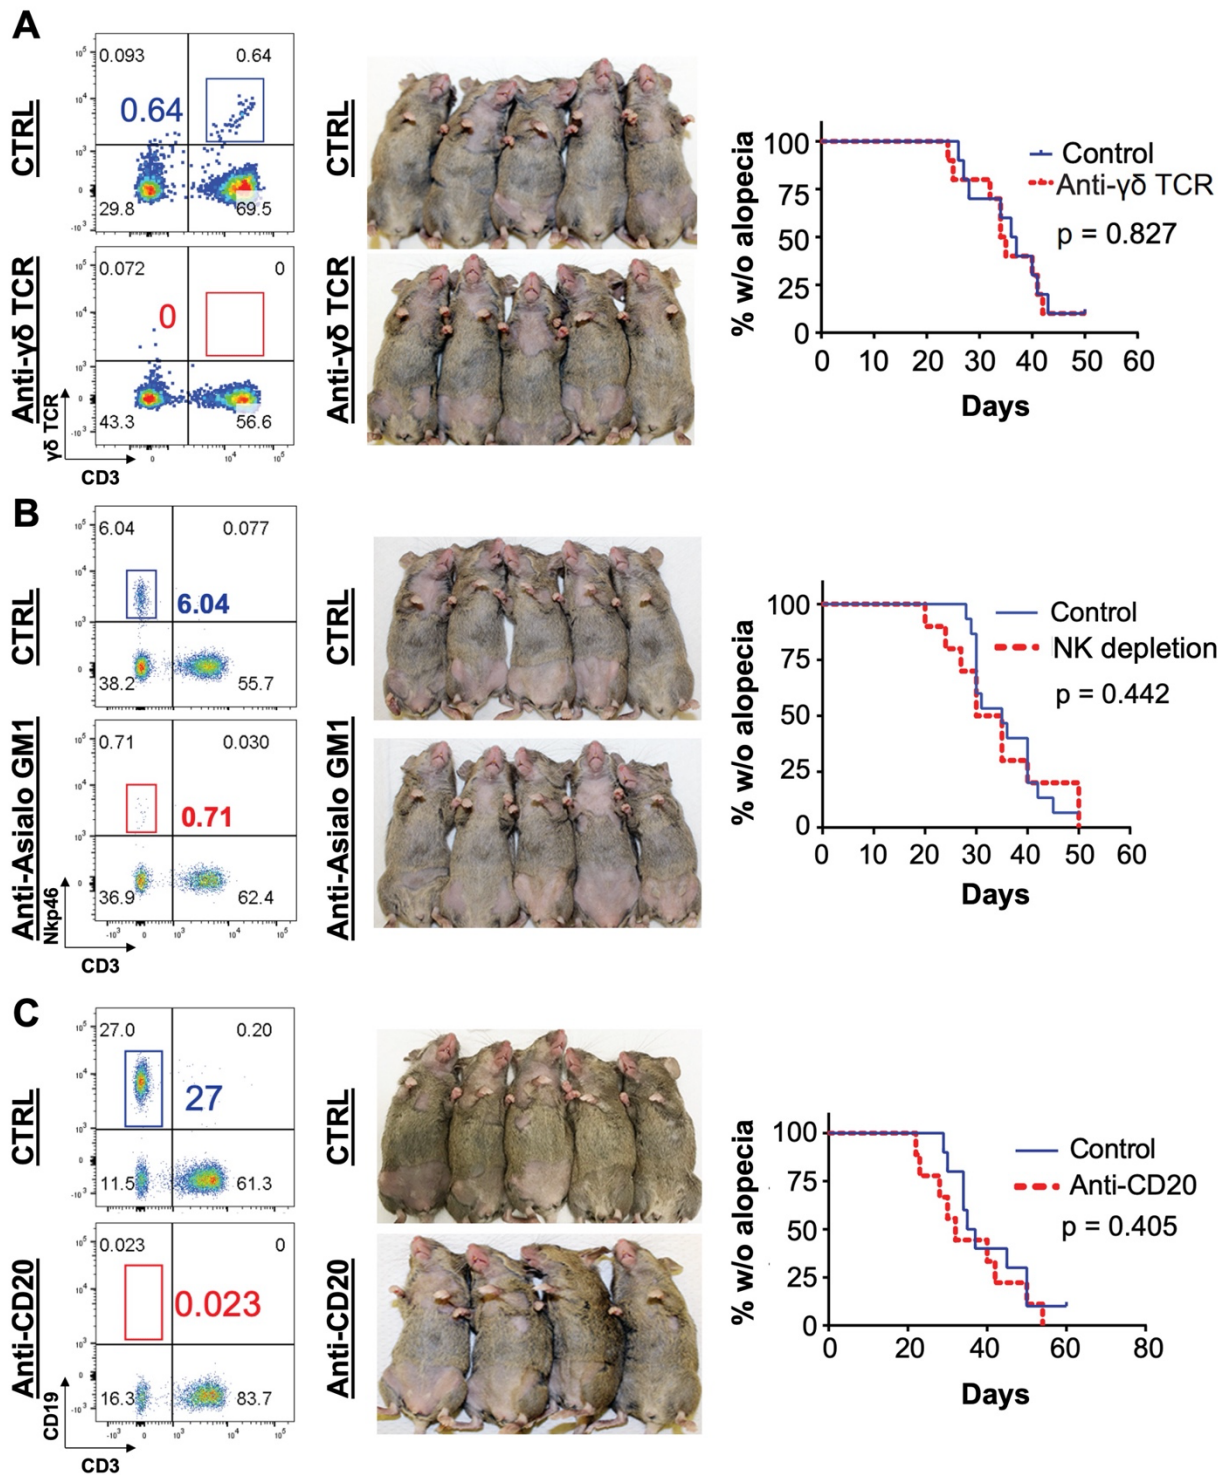

**Figure S5. Depletion of  $\gamma\delta$  T cells, NK cells, and B cells has no effect on AA development.** A) Anti- $\gamma\delta$  TCR depletion in grafted C3H/HeJ mice prior to the development of AA. B) Anti-Asialo GM1 depletion in

grafted C3H/HeJ mice prior to the development of AA to target NK cells. C) Anti-CD20 depletion in grafted C3H/HeJ mice prior to the development of AA to target B cells. Left, flow cytometry showing efficient depletion upon treatment with antibody of interest, relative to isotype control; Middle, depletion had no effect on disease onset; Right, Kaplan-Meier curve for depletion experiment.

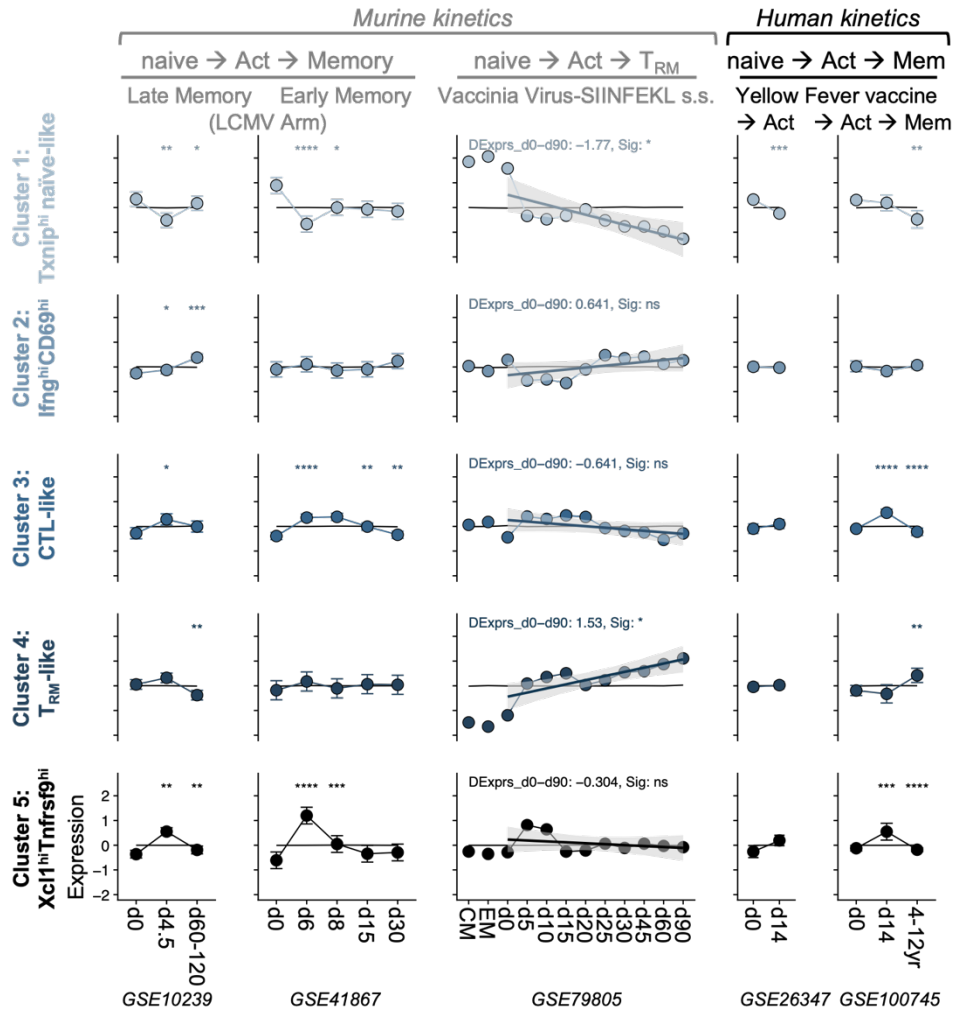

**Figure S6. Scoring transcriptome of AA murine CD8<sup>+</sup> T cells into canonical T cell differentiation trajectories.** The transcriptional signature of each of the five CD8<sup>+</sup> T cells in murine AA skin was scored against CD8<sup>+</sup> T cell signatures derived from murine LCMV infection, murine vaccinia virus infection, and human YF vaccination at various time points that span T cell differentiation from naïve, activation, and memory states. Significance values are shown for the comparison between enrichment at a given time point and the immediately preceding time point. For the vaccinia virus infection, the slope of gene enrichment (shaded) was calculated using *lm*, with slopes and significance values annotated. \**p* < 0.05; \*\**p* < 0.01; \*\*\**p* < 0.001; \*\*\*\**p* < 0.0001.

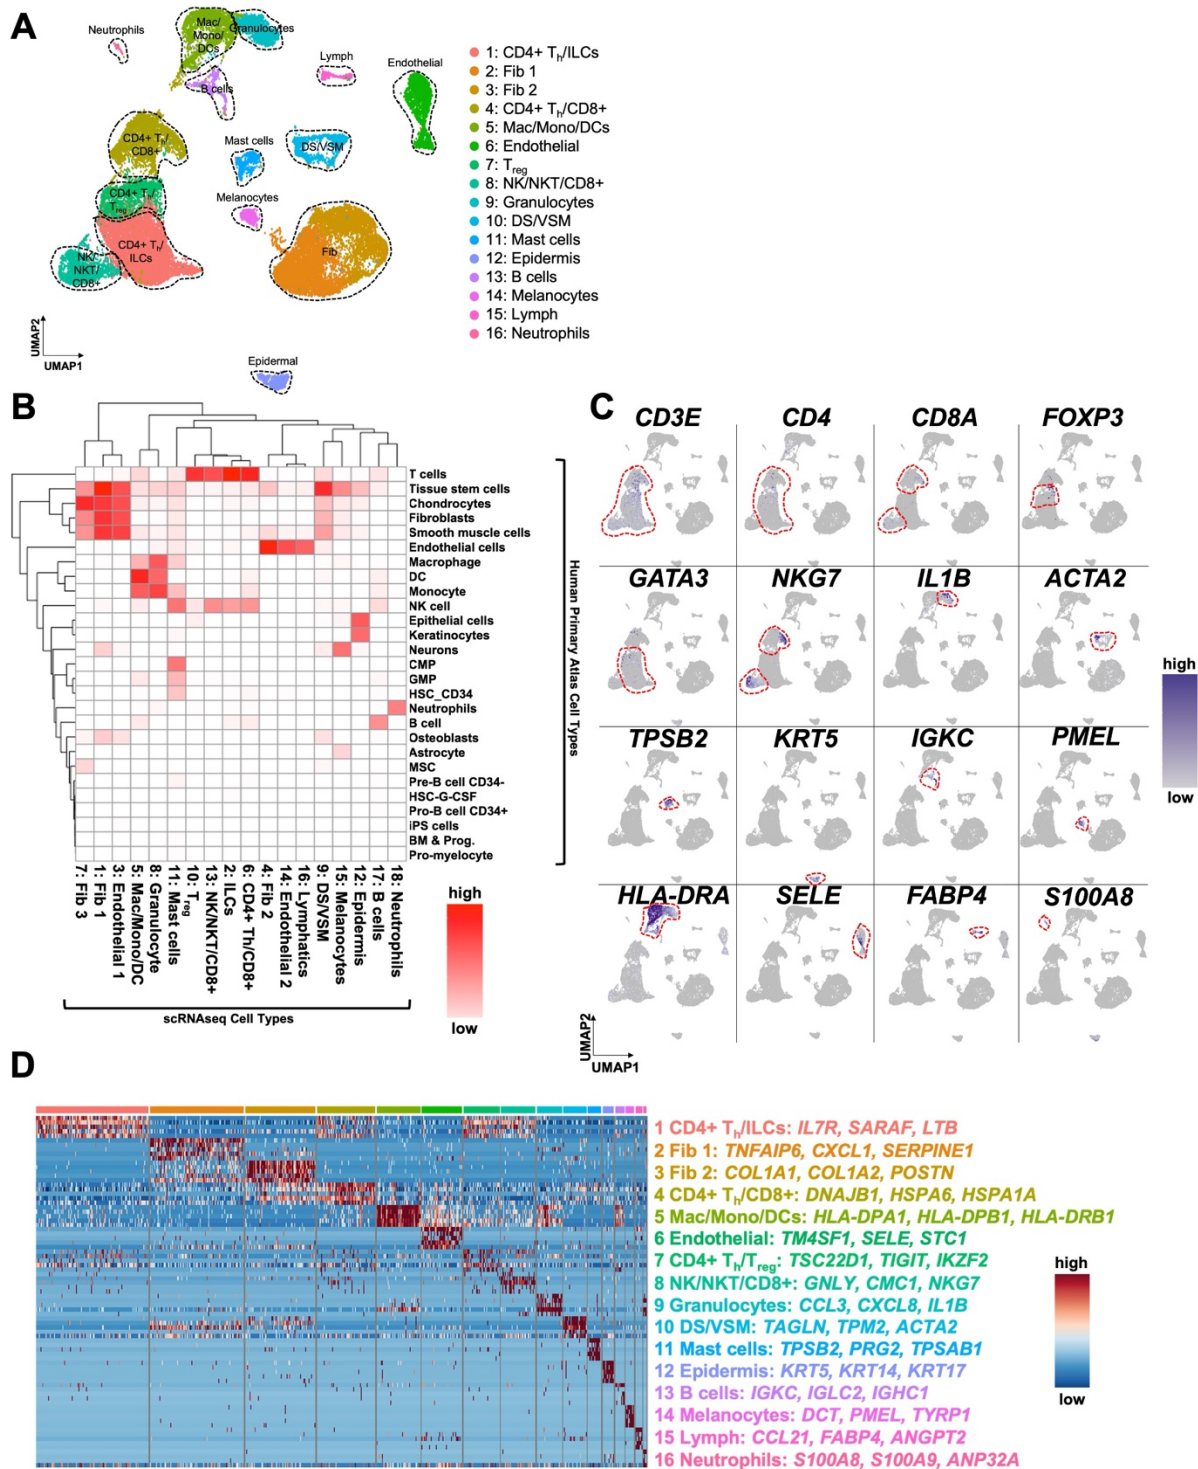

**Figure S7. scRNAseq of human AA.** A) UMAP of scRNAseq data obtained from scalp biopsies of 5 AA patients and 2 healthy controls. Unsupervised clustering of 32,134 cells (21,766 AA; 32,134 CTRL) after quality control and CCA- based alignment uncovered 16 distinct populations. B) Heatmap of normalized

correction values for SingleR-based predictions for the identity of each cluster, using the Human Primary Cell Atlas microarray dataset as a reference (6, 8). C) Expression of canonical marker genes for each cell type (i.e. *CD3E* is a marker of T cells; *CD8A* is a marker of CD8<sup>+</sup> T cells). D) Heatmap of top highly expressed genes in each cluster. CMP, common myeloid progenitors; DC, dendritic cells; DS, dermal sheath; Fib, fibroblasts; GMP, granulocyte myeloid progenitors; G-CSF, granulocyte colony-stimulating factor; HSC, hematopoietic stem cells; ILC, innate lymphoid cells; iPS, induced pluripotent stem cells; Lymph, lymphatic vessel; Mac, macrophages; Mono, monocytes; NK, natural killer cells; NKT, natural killer T cells; T<sub>h</sub>, helper T cells; T<sub>reg</sub>, regulatory T cells; VSM, vascular smooth muscle.



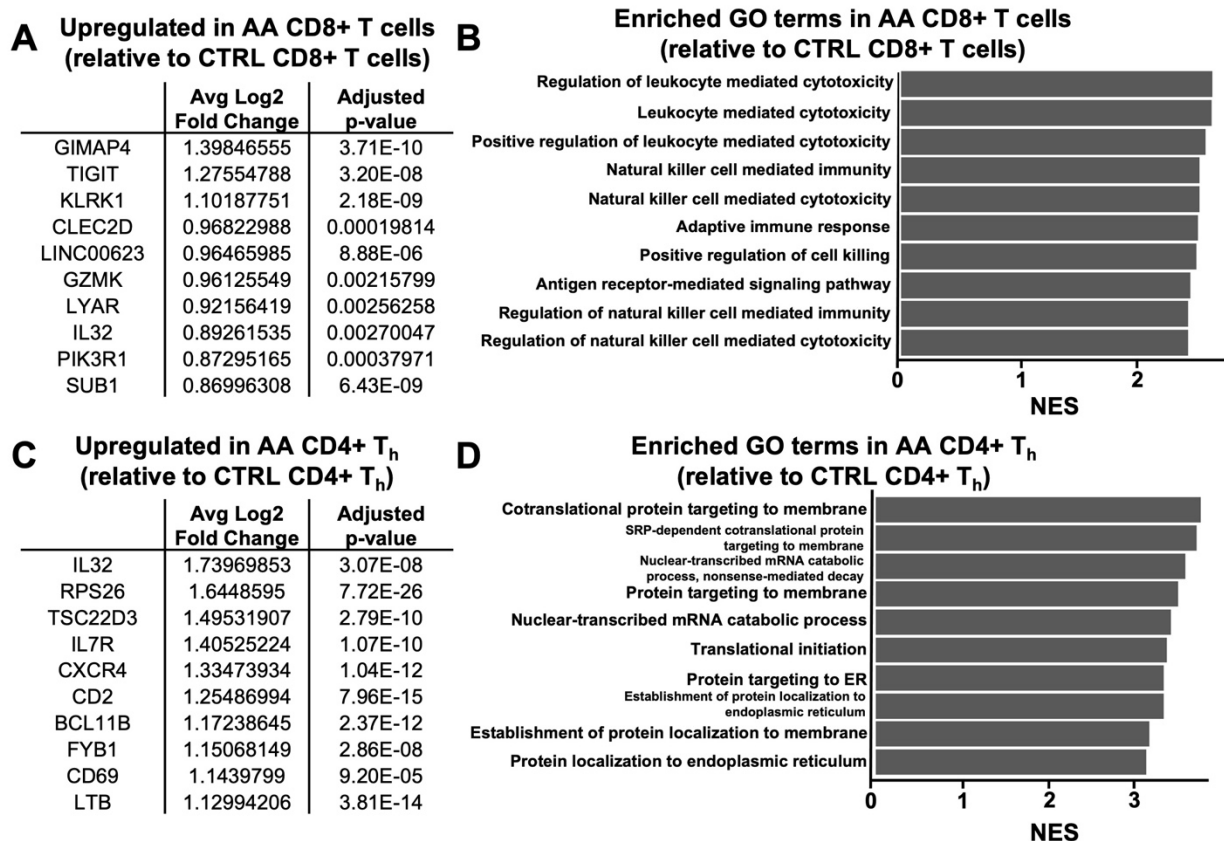

**Figure S8. Differentially expressed genes in CD4+ T<sub>h</sub> and CD8+ T cells between AA and CTRL.** A) Top upregulated genes in AA CD8+ T cells relative to CTRL CD8+ T cells. B) Top statistically significant enriched GO terms in AA CD8+ T cells as identified by GSEA of differentially expressed genes between AA and CTRL CD8+ T cells, arranged via descending NES. C) Top upregulated genes in AA CD4+ T<sub>h</sub> relative to CTRL CD4+ T<sub>h</sub>. D) Top statistically significant enriched GO terms in AA CD4+ T<sub>h</sub> as identified by GSEA of differentially expressed genes between AA and CTRL CD4+ T<sub>h</sub>, arranged via descending NES.

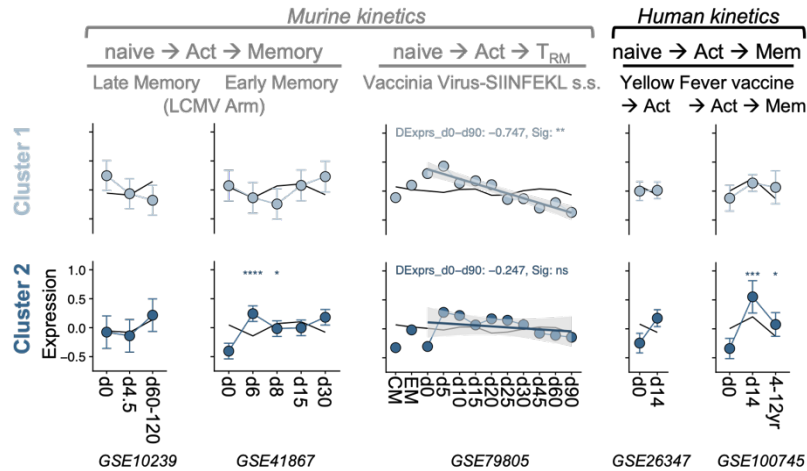

**Figure S9. Scoring transcriptome of AA human CD8+ T cells into canonical T cell differentiation trajectories.** The transcriptional signature of the two CD8+ T cell subsets in human AA skin was scored against CD8+ T cell signatures derived from murine LCMV infection, murine vaccinia virus infection, and human YF vaccination at various time points that span T cell differentiation from naïve, activation, and memory states. Significance values are shown for the comparison between enrichment at a given time point and the immediately preceding time point. \* $p < 0.05$ ; \*\* $p < 0.01$ ; \*\*\* $p < 0.001$ ; \*\*\*\* $p < 0.0001$ .

**Table S1. Signature genes for murine CD8+ T cell subsets.**

| Circulating (17, 18) | CD8_NaiveLike (19) | CD8_EarlyActive (19) | Effector (17, 18) | Trm (17, 18)  |
|----------------------|--------------------|----------------------|-------------------|---------------|
| 1700025G04Rik        | Ccr7               | Gzmk                 | 1700017B05Rik     | 2900026A02Rik |
| 3110052M02Rik        | Ii7r               | Fos                  | Cd86              | AA467197      |
| 2010012O05Rik        | Sell               | Cd69                 | Ezh2              | Abcb1b        |
| A430078G23Rik        | Tcf7               | Zfp36                | Itgb1             | Adam19        |
| Acss1                | Txk                | Fosb                 | Prr13             | Atf3          |
| Aff3                 | S1pr1              | Ccl5                 | Top2a             | B4galnt4      |
| Apobec2              | Lef1               | Gzmm                 | 2010002N04Rik     | Bag3          |
| Arhgap26             | Satb1              | Dusp2                | Cdc20b            | Bhlhe40       |
| Arhgef18             |                    | Lyar                 | F630043A04Rik     | Btg2          |
| Armc7                |                    | Samd3                | Jup               | Btg3          |
| As3mt                |                    | Cxcr4                | Prr5l             | Ccl4          |
| Aven                 |                    | Ctsw                 | Tpx2              | Cd244         |
| B3gnt5               |                    | Cd8a                 | 2010012O05Rik     | Cd69          |
| Bin2                 |                    | Anxa1                | Cdc25b            | Cdh1          |
| Car5b                |                    | Klrg1                | Fam129a           | Chd7          |
| Cdc14b               |                    | Cd8b1                | Kif11             | Chn2          |
| Cmah                 |                    | Aoah                 | Prune             | Cish          |
| D1Erttd622           |                    | Tagap                | Trdn              | Coq10b        |
| Dapl1                |                    | Klrd1                | 2610029I01Rik     | Cpd           |
| Dennd2d              |                    | Ier2                 | Cdk1              | Crem          |
| Dgka                 |                    | Gzma                 | Fancm             | Ctla4         |
| Dnahc8               |                    | Cst7                 | Kif15             | Dennd4a       |
| Dock5                |                    | Iitm2c               | Ptms              | Dgat1         |
| Dusp7                |                    | Parp8                | Trio              | Dnaja1        |
| Ehd3                 |                    | Btg2                 | 2810417H13Rik     | Dnaja4        |
| Elovl7               |                    |                      | Cdk2              | Dnajb1        |
| Eomes                |                    |                      | Fhl2              | Dnajb4        |
| F2rl2                |                    |                      | Kif22             | Dnajb6        |
| Fam49a               |                    |                      | Pus10             | Dusp1         |
| Fam53b               |                    |                      | Tspan2            | Dusp4         |
| Fam65b               |                    |                      | 2810417H13Rik     | Dusp6         |
| Fgf13                |                    |                      | Cenpa             | Egr1          |
| Flna                 |                    |                      | Fkbp5             | Ehd1          |
| Gab3                 |                    |                      | Kif23             | Eil2          |
| Gm11435              |                    |                      | Pycard            | Fasl          |
| Gramd4               |                    |                      | Tspan32           | Fbxo30        |
| Gzmm                 |                    |                      | 3110052M02Rik     | Fgl2          |

|          |  |  |               |           |
|----------|--|--|---------------|-----------|
| Haa0     |  |  | Cenpe         | Fmnl3     |
| Icam2    |  |  | Gabarapl1     | Fos       |
| Il17ra   |  |  | Klra10        | Fosl2     |
| Il18rap  |  |  | Rab11fip4     | Gabarapl1 |
| Kbtbd11  |  |  | Ubash3b       | Gadd45b   |
| Kcnj8    |  |  | 4930447A16Rik | Gem       |
| Klf2     |  |  | Cenpk         | Glrx      |
| Klhdc1   |  |  | Galnt3        | Gpr171    |
| Klrb1c   |  |  | Klra3         | Gpr56     |
| Klrg1    |  |  | Racgap1       | Gzmb      |
| Lair1    |  |  | Unc119        | H3f3b     |
| Lfng     |  |  | 4930515G01Rik | Havcr2    |
| Limd1    |  |  | Cep55         | Hip1      |
| Lpin1    |  |  | Gem           | Hpgds     |
| Ly9      |  |  | Klra6         | Hsp90aa1  |
| Mboat1   |  |  | Rap1gap2      | Hspa5     |
| Ms4a4c   |  |  | Usp3          | Icos      |
| Nck2     |  |  | 4930547N16Rik | Iifng     |
| Nfatc3   |  |  | Cep76         | Iifrd1    |
| Nod1     |  |  | Glcci1        | Il21r     |
| Nsg2     |  |  | Klra8         | Il4ra     |
| Pde2a    |  |  | Rbms1         | Inpp4b    |
| Pion     |  |  | Usp46         | Irf4      |
| Prss12   |  |  | 6330403K07Rik | Isg20     |
| Prune    |  |  | Cercam        | Iisy1     |
| Pycard   |  |  | Gm10286       | Iigta1    |
| Qprt     |  |  | Klre1         | Jun       |
| Rap1gap2 |  |  | Reep5         | Junb      |
| Rasa3    |  |  | Whsc1         | Kdm6b     |
| Rasgrp2  |  |  | A630007B06Rik | Litaf     |
| Rgs19    |  |  | Chd7          | Lmnb1     |
| S1pr1    |  |  | Gm10785       | Ly6g5b    |
| S1pr4    |  |  | Klrg1         | Mxd1      |
| Samd3    |  |  | Rhoq          | Mxi1      |
| Sell     |  |  | Xlr           | Neur13    |
| Sfxn3    |  |  | Adam17        | Nfil3     |
| Sh2d1a   |  |  | Chn2          | Nfkbie    |
| Sh3bp5   |  |  | Gm10786       | Nr4a1     |
| Sidt1    |  |  | Kntc1         | Nr4a2     |

|          |  |  |          |           |
|----------|--|--|----------|-----------|
| Sike1    |  |  | Rnf19a   | Nr4a3     |
| Slamf6   |  |  | Xpnpep1  | Ntan1     |
| Smpdl3b  |  |  | Ahnak    | Odc1      |
| Spn      |  |  | Chsy1    | P2ry10    |
| Stard10  |  |  | Gm11277  | P4hb      |
| Tcf7     |  |  | Lag3     | Pdcd1     |
| Tlr1     |  |  | Rnf216   | Per1      |
| Tmem71   |  |  | Zeb2     | Plk3      |
| Tnfrsf26 |  |  | AI597468 | Plscr1    |
| Traf3ip3 |  |  | Cited2   | Pmepa1    |
| Ubxn2b   |  |  | Gm14005  | Pp1r15a   |
| Usp33    |  |  | Lamc1    | Prdx6     |
| Ypel1    |  |  | Rnpep    | Ptp4a1    |
| Zeb2     |  |  | Zfand5   | Qpct      |
| Zfp595   |  |  | Ak3      | Rbpj      |
| Zfp760   |  |  | Cldnd2   | Rgs1      |
|          |  |  | Gm4884   | Rgs10     |
|          |  |  | Lass6    | Rgs16     |
|          |  |  | Rora     | Rhob      |
|          |  |  | Zfp40    | Rnf149    |
|          |  |  | Alcam    | Rrad      |
|          |  |  | Cmklr1   | Sik1      |
|          |  |  | Gm8615   | Skil      |
|          |  |  | Lgals1   | Slc16a6   |
|          |  |  | Rrm2     | Slc7a5    |
|          |  |  | Zfp874b  | Spty2d1   |
|          |  |  | Anln     | Ssbp2     |
|          |  |  | Cmpk1    | Stk17b    |
|          |  |  | Gna15    | Tgif1     |
|          |  |  | Lgals3   | Tigit     |
|          |  |  | S100a4   | Tiparp    |
|          |  |  | Anxa4    | Tjp1      |
|          |  |  | Cry1     | Tnf       |
|          |  |  | Gpx8     | Tnfaip3   |
|          |  |  | Lmnb1    | Tnfrsf1b  |
|          |  |  | S1pr5    | Tnfrsf9   |
|          |  |  | Apaf1    | Tra2a     |
|          |  |  | Crybg3   | Trib1     |
|          |  |  | Grxcr1   | Trp53inp2 |

|  |  |  |               |         |
|--|--|--|---------------|---------|
|  |  |  | LOC100503984  | Ube2s   |
|  |  |  | Scd2          | Vps37b  |
|  |  |  | Apobec2       | Wsb1    |
|  |  |  | Csda          | Xcl1    |
|  |  |  | Gsn           | Zfand5  |
|  |  |  | Lxn           | Zfp36l1 |
|  |  |  | Serinc5       |         |
|  |  |  | Arhgap11a     |         |
|  |  |  | Csnk1e        |         |
|  |  |  | Gzma          |         |
|  |  |  | Manba         |         |
|  |  |  | Serpinb6b     |         |
|  |  |  | Arhgap19      |         |
|  |  |  | Ctnnbip1      |         |
|  |  |  | Gzmb          |         |
|  |  |  | Mki67         |         |
|  |  |  | Shcbp1        |         |
|  |  |  | Arhgef12      |         |
|  |  |  | Ctsc          |         |
|  |  |  | Gzmk          |         |
|  |  |  | Msc           |         |
|  |  |  | Slc25a20      |         |
|  |  |  | Arntl         |         |
|  |  |  | Cx3cr1        |         |
|  |  |  | Havcr2        |         |
|  |  |  | Mxi1          |         |
|  |  |  | Slc25a33      |         |
|  |  |  | Art2a-ps      |         |
|  |  |  | Cyp3a16       |         |
|  |  |  | Hbb-b2        |         |
|  |  |  | Ncapg         |         |
|  |  |  | Slc25a45      |         |
|  |  |  | As3mt         |         |
|  |  |  | D330041H03Rik |         |
|  |  |  | Hiatl1        |         |
|  |  |  | Ndn2          |         |
|  |  |  | Slc4a7        |         |
|  |  |  | Asna1         |         |
|  |  |  | Dapk2         |         |

|  |  |  |           |  |
|--|--|--|-----------|--|
|  |  |  | Hist1h1b  |  |
|  |  |  | Nebi      |  |
|  |  |  | Snx10     |  |
|  |  |  | Atoh1     |  |
|  |  |  | Dclk2     |  |
|  |  |  | Hist1h2ab |  |
|  |  |  | Nipal3    |  |
|  |  |  | Snx5      |  |
|  |  |  | Atp2a3    |  |
|  |  |  | Ddx19b    |  |
|  |  |  | Hist1h2ak |  |
|  |  |  | Nqo2      |  |
|  |  |  | Sord      |  |
|  |  |  | Atp6v1d   |  |
|  |  |  | Ddx28     |  |
|  |  |  | Hist1h2bf |  |
|  |  |  | Nrp1      |  |
|  |  |  | Sp140     |  |
|  |  |  | AU022870  |  |
|  |  |  | Dennd5a   |  |
|  |  |  | Hist1h2bj |  |
|  |  |  | Olfr598   |  |
|  |  |  | Spag1     |  |
|  |  |  | BC013712  |  |
|  |  |  | Depdc1a   |  |
|  |  |  | Hist1h2bk |  |
|  |  |  | Olfr766   |  |
|  |  |  | Spag5     |  |
|  |  |  | Bhlhe40   |  |
|  |  |  | Depdc1b   |  |
|  |  |  | Hist1h2bm |  |
|  |  |  | Osbpl3    |  |
|  |  |  | Spast     |  |
|  |  |  | Bub1      |  |
|  |  |  | Dhx40     |  |
|  |  |  | Hist1h2bn |  |
|  |  |  | Osbpl8    |  |
|  |  |  | Spc25     |  |
|  |  |  | Bub1b     |  |

|  |  |  |               |  |
|--|--|--|---------------|--|
|  |  |  | Dlgap5        |  |
|  |  |  | Hmgb2         |  |
|  |  |  | Palm          |  |
|  |  |  | Spn           |  |
|  |  |  | C330027C09Rik |  |
|  |  |  | Dnajc1        |  |
|  |  |  | I830127L07Rik |  |
|  |  |  | Pdcd1         |  |
|  |  |  | Sptlc2        |  |
|  |  |  | Car5b         |  |
|  |  |  | Dock5         |  |
|  |  |  | Icos          |  |
|  |  |  | Pgm2l1        |  |
|  |  |  | Stmn1         |  |
|  |  |  | Carhsp1       |  |
|  |  |  | Dtl           |  |
|  |  |  | Idh2          |  |
|  |  |  | Pld4          |  |
|  |  |  | Stx11         |  |
|  |  |  | Casc5         |  |
|  |  |  | Dync1li2      |  |
|  |  |  | Igf2bp3       |  |
|  |  |  | Plek          |  |
|  |  |  | Sun1          |  |
|  |  |  | Casp3         |  |
|  |  |  | E2f2          |  |
|  |  |  | Il18rap       |  |
|  |  |  | Plekhf1       |  |
|  |  |  | Suox          |  |
|  |  |  | Casp7         |  |
|  |  |  | E2f8          |  |
|  |  |  | Inpp4a        |  |
|  |  |  | Plekho1       |  |
|  |  |  | Swap70        |  |
|  |  |  | Ccna2         |  |
|  |  |  | Efh2          |  |
|  |  |  | Irf4          |  |
|  |  |  | Pmaip1        |  |
|  |  |  | Tbcc          |  |



|  |  |  |         |  |
|--|--|--|---------|--|
|  |  |  | Ccnb1   |  |
|  |  |  | Emp1    |  |
|  |  |  | Itga2   |  |
|  |  |  | Pola1   |  |
|  |  |  | Tbkbp1  |  |
|  |  |  | Ccnb2   |  |
|  |  |  | Ern1    |  |
|  |  |  | Itga4   |  |
|  |  |  | Prc1    |  |
|  |  |  | Timp2   |  |
|  |  |  | Ccne2   |  |
|  |  |  | Esm1    |  |
|  |  |  | Itgam   |  |
|  |  |  | Prdm1   |  |
|  |  |  | Tmem165 |  |
|  |  |  | Cd68    |  |
|  |  |  | Etfb    |  |
|  |  |  | Itgax   |  |
|  |  |  | Prdx4   |  |
|  |  |  | Tmf1    |  |

**Table S2. List of antibodies used in the study.**

| Name                           | Clone     | Company                  | Catalog No. | Use               |
|--------------------------------|-----------|--------------------------|-------------|-------------------|
| anti-mouse CD45-A700           | 30-F11    | BD                       | BDB560510   | Flow Cytometry    |
| anti-mouse CD45-FITC           | 30-F11    | BioLegend                | 103108      | Flow Cytometry    |
| anti-mouse CD3-BV421           | 17A2      | BioLegend                | 100227      | Flow Cytometry    |
| anti-mouse CD3-PerCP           | 17A2      | Fisher Scientific        | 46-0032-82  | Flow Cytometry    |
| anti-mouse CD3-PE-Dazzle 594   | 17A2      | BioLegend                | 100245      | Flow Cytometry    |
| anti-mouse CD3-PE/Cy7          | 17A2      | BioLegend                | 100219      | Flow Cytometry    |
| anti-mouse CD4-PerCP           | GK1.5     | BioLegend                | 100431      | Flow Cytometry    |
| anti-mouse CD4-BV711           | GK1.5     | BioLegend                | 100447      | Flow Cytometry    |
| anti-mouse CD8 $\alpha$ -BV605 | 53-6.7    | BioLegend                | 100743      | Flow Cytometry    |
| anti-mouse CD8 $\beta$ -APC    | 53-5.8    | BioLegend                | 140410      | Flow Cytometry    |
| anti-mouse CD19-APC            | 1D3       | BioLegend                | 152409      | Flow Cytometry    |
| anti-mouse Nkp46-BV421         | 29A1.4    | BioLegend                | 137611      | Flow Cytometry    |
| anti-mouse CD25-APC-eFluor 780 | PC61.5    | eBioscience              | 47-0251-82  | Flow Cytometry    |
| anti-mouse CD25-BV421          | PC61      | BD                       | 562606      | Flow Cytometry    |
| anti-mouse FoxP3-FITC          | FJK-16s   | Thermo Fisher Scientific | 11-5773-82  | Flow Cytometry    |
| anti-mouse FoxP3-PE-eFluor 610 | FJK-16s   | Thermo Fisher Scientific | 61-5773-82  | Flow Cytometry    |
| anti-mouse TCR $\gamma$ -APC   | GL3       | BioLegend                | 118116      | Flow Cytometry    |
| anti-mouse CD4                 | GK1.5     | Bio X Cell               | BE00031     | In Vivo Depletion |
| anti-mouse CD8 $\alpha$        | YTS 169.4 | Bio X Cell               | BP0117      | In Vivo Depletion |
| anti-mouse CD25                | PC61      | Bio X Cell               | BP0012      | In Vivo Depletion |
| anti-mouse CD20                | AISB12    | Bio X Cell               | BE0302      | In Vivo Depletion |
| anti-mouse Asialo GM1          | N/A       | Fisher Scientific        | NC1345696   | In Vivo Depletion |
| anti-mouse FR4                 | TH6       | BioLegend                | 125111      | In Vivo Depletion |
| ant-mouse TCR $\gamma/\delta$  | UD7-13D5  | BioLegend                | 107502      | In Vivo Depletion |

## SI References

1. A. N. McMurchy, M. K. Levings, Suppression assays with human T regulatory cells: a technical guide. *Eur J Immunol* **42**, 27–34 (2012).
2. A. Butler, P. Hoffman, P. Smibert, E. Papalexi, R. Satija, Integrating single-cell transcriptomic data across different conditions, technologies, and species. *Nat Biotechnol* **36**, 411–420 (2018).
3. T. Stuart, *et al.*, Comprehensive Integration of Single-Cell Data. *Cell* **177**, 1888–1902.e21 (2019).
4. C. Hafemeister, R. Satija, Normalization and variance stabilization of single-cell RNA-seq data using regularized negative binomial regression. *Genome Biology* **20**, 296 (2019).
5. A. Obradovic, *et al.*, Single-cell protein activity analysis identifies recurrence-associated renal tumor macrophages. *Cell* **184**, 2988–3005.e16 (2021).
6. D. Aran, *et al.*, Reference-based analysis of lung single-cell sequencing reveals a transitional profibrotic macrophage. *Nat Immunol* **20**, 163–172 (2019).
7. T. S. P. Heng, M. W. Painter, Immunological Genome Project Consortium, The Immunological Genome Project: networks of gene expression in immune cells. *Nat Immunol* **9**, 1091–1094 (2008).
8. N. A. Mabbott, J. K. Baillie, H. Brown, T. C. Freeman, D. A. Hume, An expression atlas of human primary cells: inference of gene function from coexpression networks. *BMC Genomics* **14**, 632 (2013).
9. G. Finak, *et al.*, MAST: a flexible statistical framework for assessing transcriptional changes and characterizing heterogeneity in single-cell RNA sequencing data. *Genome Biol* **16**, 278 (2015).
10. X. Qiu, *et al.*, Single-cell mRNA quantification and differential analysis with Census. *Nat Methods* **14**, 309–315 (2017).
11. X. Qiu, *et al.*, Reversed graph embedding resolves complex single-cell trajectories. *Nat Methods* **14**, 979–982 (2017).
12. A. Jaiswal, *et al.*, An activation to memory differentiation trajectory of tumor-infiltrating lymphocytes informs metastatic melanoma outcomes. *Cancer Cell* **40**, 524–544.e5 (2022).
13. S. Sarkar, *et al.*, Functional and genomic profiling of effector CD8 T cell subsets with distinct memory fates. *Journal of Experimental Medicine* **205**, 625–640 (2008).
14. T. A. Doering, *et al.*, Network Analysis Reveals Centrally Connected Genes and Pathways Involved in CD8+ T Cell Exhaustion versus Memory. *Immunity* **37**, 1130–1144 (2012).
15. R. S. Akondy, *et al.*, Origin and differentiation of human memory CD8 T cells after vaccination. *Nature* **552**, 362–367 (2017).
16. Y. Pan, *et al.*, Survival of tissue-resident memory T cells requires exogenous lipid uptake and metabolism. *Nature* **543**, 252–256 (2017).
17. J. J. Milner, *et al.*, Heterogenous Populations of Tissue-Resident CD8+ T Cells Are Generated in Response to Infection and Malignancy. *Immunity* **52**, 808–824.e7 (2020).
18. J. J. Milner, *et al.*, Runx3 programs CD8+ T cell residency in non-lymphoid tissues and tumours. *Nature* **552**, 253–257 (2017).

19. M. Andreatta, *et al.*, Interpretation of T cell states from single-cell transcriptomics data using reference atlases. *Nat Commun* **12**, 2965 (2021).
